# Supplementary material
Source: PubMed Central journal article supplement (PMC11287426)
Supplement: NIHMS2009814-supplement-Supplemental_material.pdf [file NIHMS2009814-supplement-Supplemental_material.pdf]

# SSP Vaccination Survey

The Centers for Disease Control and Prevention is conducting surveys with staff from syringe services programs. These surveys will help us to understand barriers and opportunities to offering vaccination services to clients. The survey will take no more than 45 minutes to complete. In the survey we will ask about logistics, staffing, and resources needed to offer vaccination services. Your input is greatly valued and appreciated. We want to learn from you. We encourage you to respond openly and honestly about your experience. There are no right or wrong answers.

Thank you for taking part in this survey. If you have any questions, contact the CDC Project Lead, Martha Montgomery, [lw6@cdc.gov](mailto:lw6@cdc.gov).

Please enter the 4-digit ID number provided in the email.

---

## Syringe Services Program Characteristics The first section asks about characteristics of your SSP.

What is the approximate number of total client visits per month at your SSP?

(To decline or if unknown, enter '9999')

What is the approximate number of clients (deduplicated) served per month at your SSP (if known)?

(To decline or if unknown, enter '9999')

Enter the approximate percent (a rough estimate is fine) of clients served at your SSP for each demographic category (total number for each category should equal 100).

To decline, enter '0' for each box and select checkbox "decline."

Age Age 20 years and younger \_\_\_\_\_ % Age 21-64 years \_\_\_\_\_ % Age 65 years or older \_\_\_\_\_ % \_\_\_\_\_  
 Gender Male gender \_\_\_\_\_ % Female gender \_\_\_\_\_ % Transgender \_\_\_\_\_ % \_\_\_\_\_  
 Race American Indian/Alaska Native \_\_\_\_\_ % Asian \_\_\_\_\_ % Black/African American \_\_\_\_\_ % Native Hawaiian/other Pacific Islander \_\_\_\_\_ %  
 White \_\_\_\_\_ % Other race \_\_\_\_\_ % More than one race \_\_\_\_\_ % \_\_\_\_\_  
 Ethnicity Hispanic or Latino \_\_\_\_\_ % not Hispanic or Latino \_\_\_\_\_ % \_\_\_\_\_  
 Housing Experiencing homelessness \_\_\_\_\_ % \_\_\_\_\_

Which of the following best describes your SSP service delivery model? Select all that apply.

Definitions are provided from NASTAD as follows:

**Fixed site.** Fixed-site models include hospital/clinic-based settings, integrated syringe access services, and collaboration or satellite structures. Typically in fixed-site models, the SSP is located in a building or specific location, such as a storefront, office, or other space with street-level access.

**Hospital/clinic-based setting.** A fixed-site model of syringe access in which services are located at a hospital or clinic-based setting.

**Integrated syringe access services.** In the integrated syringe access services model, an organization that is already serving IDUs in a fixed site adds syringe services to its existing set of services, rather than creating a separate SSP.

**Collaboration or satellite structure.** In the collaboration or satellite structure model, existing SSPs provide syringe services at partner social service agencies in fixed sites in the community (e.g., social services, shelters).

**Mobile/street-based.** Mobile/street-based programs are conducted on foot, by bicycle or by vehicle (e.g., van, bus, or recreational vehicle). This method is also referred to as outreach. Many mobile SSPs stop at specified locations and times, whereas others may simply roam unplanned.

**Secondary or peer-delivery model.** Secondary or peer-delivery models involve SSPs providing IDUs with syringes to distribute and disposal options to their drug-using networks. Secondary access is typically combined with a fixed site, such that peers can come to a fixed site and obtain and dispose of syringe equipment that they then provide to other IDUs in their social networks. However, it is also possible to arrange transfer of equipment through pick-up or delivery.

**Delivery model.** The delivery model involves the delivery of injection supplies to a prearranged site, such as a house, apartment, hotel, shooting gallery or other prearranged location. Service delivery can take place on a regular schedule or by appointment.

**Pharmacy distribution model.** Over-the-counter sale of syringes through pharmacies.

**Pharmacy voucher program.** Social service agencies work with pharmacies to create a voucher that IDUs can redeem for free syringes at participating pharmacies.

- Fixed site
- Hospital/clinic-based setting
- Integrated syringe access services
- Collaboration or satellite structure
- Mobile/street-based
- Secondary or peer-delivery model
- Delivery model
- Pharmacy distribution model
- Pharmacy voucher program

Does your SSP operate mostly in a rural or urban setting?

- mostly rural
- mostly urban
- unknown
- decline

Who operates your SSP? Select all that apply.

- Hospital or health system
- Federally Qualified Health Center (Community Health Center, Rural Health Center)
- Health Department
- University (non-medical; if academic medical center, select hospital/health system above)
- Substance use treatment facility
- Community-based organization or community coalition
- Other, specify
- Unknown

If other, specify who operates your SSP

**Vaccination Questions The following set of questions ask about general attitudes and practices related to vaccination services.**

How important is it that your SSP provide vaccinations for your clients?

- Not important    Somewhat important    Very important    Decline

How important is providing vaccinations compared with other services offered (needle/syringe exchange, counseling, condoms)?

- Not important    Somewhat important    Very important    Decline

Does your SSP have the ability to enroll clients in health insurance?

- Yes    No    Unknown    Decline

Does your SSP have the capacity to submit claims to health insurance for reimbursement?

- Yes    No    Unknown    Decline

If yes, has your SSP experienced challenges with health insurance payments or reimbursements in the past 12 months?

- No challenges    Minor challenges    Major challenges    Unknown    Decline

Does your SSP currently offer vaccinations on site?

- Yes    No

**Existing Resources and Practices The following set of questions ask about your existing vaccination resources and practices.**

Which vaccines does your SSP offer?

- COVID-19 \_\_\_\_\_  
 Hepatitis A \_\_\_\_\_  
 Hepatitis B \_\_\_\_\_  
 Hepatitis A and B combination (Twinrix) \_\_\_\_\_  
 Human papillomavirus (HPV) \_\_\_\_\_  
 Influenza \_\_\_\_\_  
 Pneumococcal (e.g., PCV13, PPSV23) \_\_\_\_\_  
 Tetanus (e.g., Tdap, Td) \_\_\_\_\_  
 Zoster or shingles \_\_\_\_\_  
 Other, specify \_\_\_\_\_

From where does your SSP receive vaccines? Select all that apply.

- State or local health department (private or state purchased vaccine)  
 Our SSP is enrolled as a Vaccine for Adults or 317 vaccine provider (federally purchased vaccine. Vaccines would come directly from McKesson)  
 Partnerships with hospital or health system  
 Group purchasing organization  
 Direct purchase from manufacturer or distributor  
 Ordered separately by in-house pharmacy  
 Other  
 Unknown

If other vaccine source, specify \_\_\_\_\_

---

Does your SSP receive any grants to cover vaccination costs?

Yes  
 No  
 Unknown  
 Decline

---

Does your SSP have written protocols on vaccine storage and handling?

Yes  
 No  
 Unknown  
 Decline

---

Does your SSP have standing orders or nurse-driven protocols for vaccinations?

Yes  
 No  
 Unknown  
 Decline

---

Does your SSP have sufficient funding to cover the following vaccination supplies?

Vaccine doses? \_\_\_\_\_

Vaccine storage and handling (e.g., refrigeration, temperature monitoring)? \_\_\_\_\_

Vaccine administration supplies (e.g., needles, syringes, alcohol prep pads, adhesive bandages)? \_\_\_\_\_

Vaccine education materials? \_\_\_\_\_

---

Does your SSP have staff who are licensed to administer vaccination (e.g., according to state and local licensing regulations)?

Yes  
 No  
 Unknown  
 Decline

---

Does your SSP have staff to perform data entry to record vaccinations?

Yes  
 No  
 Unknown  
 Decline

---

Do you submit vaccine administration data to the state or local immunization information system?

Yes  
 No  
 Unknown  
 Decline

---

Are you able to access your state or local immunization information system to review clients' vaccination history?

Yes  
 No  
 Unknown  
 Decline

---

Do you assess vaccination history prior to vaccine administration?

Yes  
 No  
 Unknown  
 Decline

---

Do you have a system to follow-up with or send reminders to clients for vaccines that require multiple doses?

Yes  
 No  
 Unknown  
 Decline

---

Do you assess hepatitis B immune status prior to hepatitis B vaccine administration?

Yes  
 No  
 Unknown  
 Decline

---

**Resource Needs The following set of questions relate to resource and staffing needs to provide vaccinations.**

Which of the following are important resource needs for your SSP to provide vaccinations?

- Training on how to enroll clients in health insurance \_\_\_\_\_  
 More vaccine supply \_\_\_\_\_  
 More vaccine administration supplies (e.g., needles, syringes, alcohol prep pads, adhesive bandages) \_\_\_\_\_  
 Equipment to store vaccine (e.g., refrigerators, temperature monitoring) \_\_\_\_\_  
 Better systems to follow-up with clients to complete multiple dose series (e.g., electronic database, reminder-recall) \_\_\_\_\_  
 Other, specify \_\_\_\_\_

Which resource is the single most important need?

- Training on how to enroll clients in health insurance  
 More vaccine supply  
 More vaccine administration supplies (e.g., needles, syringes, alcohol prep pads, adhesive bandages)  
 Equipment to store vaccine (e.g., refrigerators, temperature monitoring)  
 Better systems to follow-up with clients to complete multiple dose series (e.g., electronic database, reminder-recall)  
 Other (as specified above)  
 Decline

Which of the following are staffing needs at your SSP?

- More staff who are licensed to administer vaccines \_\_\_\_\_  
 More data entry staff \_\_\_\_\_  
 Staff training on how to properly store and handle vaccines \_\_\_\_\_  
 Staff training on motivational interviewing and how to address client vaccination questions \_\_\_\_\_  
 Staff training on how to prepare and administer vaccines \_\_\_\_\_  
 Staff training on how to screen clients for susceptibility and eligibility for different vaccines \_\_\_\_\_  
 More time to administer vaccine during clinic visits \_\_\_\_\_  
 Staff training on how to collect, enter, and transmit vaccinate administration data \_\_\_\_\_  
 Staff training on how to report vaccination adverse events \_\_\_\_\_  
 Staff training on how to submit to health insurance for reimbursement \_\_\_\_\_  
 Other, specify \_\_\_\_\_

Which staffing need is the single most important?

- More staff who are licensed to administer vaccines  
 More data entry staff  
 Staff training on how to properly store and handle vaccines  
 Staff training on motivational interviewing and how to address client vaccination questions  
 Staff training on how to prepare and administer vaccines  
 Staff training on how to screen clients for susceptibility and eligibility for different vaccines  
 More time to administer vaccine during clinic visits  
 Staff training on how to collect, enter, and transmit vaccinate administration data  
 Staff training on how to report vaccination adverse events  
 Staff training on how to submit to health insurance for reimbursement  
 Other (as specified above)  
 Decline

### Clients The final question asks about client barriers to vaccination.

How common are the following reasons for clients who decline vaccination?

- Client does not have health insurance \_\_\_\_\_  
 Client has health insurance, but the vaccine is only available for un- or underinsured \_\_\_\_\_  
 Client is not susceptible (e.g., already vaccinated or already infected) \_\_\_\_\_  
 Client does not have enough time to get vaccinated \_\_\_\_\_  
 Client has competing needs of higher priority (e.g., food, clothing, shelter) \_\_\_\_\_  
 Client expresses concern about vaccination (e.g., side effects, does not trust vaccine safety, does not trust vaccine manufacturers) \_\_\_\_\_  
 Client does not feel they are at risk \_\_\_\_\_  
 Other, specify \_\_\_\_\_

### Existing Resources and Practices The following set of questions ask about your existing SSP resources and practices.

Do you collaborate with another provider or facility to offer vaccinations to SSP clients at a nearby location?

- Yes, nearby clinic or health facility  
 Yes, nearby public health department  
 Yes, nearby pharmacy  
 Yes, mobile van  
 Yes, other  
 No  
 Unknown

If your SSP were planning to expand services to include vaccinations, does your SSP have sufficient funding to cover the following vaccination supplies?

- Vaccine doses? \_\_\_\_\_  
 Vaccine storage and handling (e.g., refrigeration, temperature monitoring)? \_\_\_\_\_  
 Vaccine administration supplies (e.g., needles, syringes, alcohol prep pads, adhesive bandages)? \_\_\_\_\_  
 Vaccine education materials? \_\_\_\_\_

Does your SSP have staff who are licensed to administer vaccination (e.g., according to state and local licensing regulations)?

- Yes  
 No  
 Unknown  
 Decline

Does your SSP have staff to perform data entry to record vaccinations?

- Yes  
 No  
 Unknown  
 Decline

### Resource Needs The following set of questions relate to resource and staffing needs to provide vaccinations.

Which of the following are important resource needs for your SSP to provide vaccinations?

- Training on how to enroll clients in health insurance \_\_\_\_\_  
 More vaccine supply \_\_\_\_\_  
 More vaccine administration supplies (e.g., needles, syringes, alcohol prep pads, adhesive bandages) \_\_\_\_\_  
 Equipment to store vaccine (e.g., refrigerators, temperature monitoring) \_\_\_\_\_  
 Better systems to follow-up with clients to complete multiple dose series (e.g., electronic database, reminder-recall) \_\_\_\_\_  
 Other, specify \_\_\_\_\_

---

Which resource is the single most important need?

- Training on how to enroll clients in health insurance
- More vaccine supply
- More vaccine administration supplies (e.g., needles, syringes, alcohol prep pads, adhesive bandages)
- Equipment to store vaccine (e.g., refrigerators, temperature monitoring)
- Better systems to follow-up with clients to complete multiple dose series (e.g., electronic database, reminder-recall)
- Other (as specified above)
- Decline

---

Which of the following are staffing needs if your SSP were to provide vaccinations?

- More staff who are licensed to administer vaccines \_\_\_\_\_
- More data entry staff \_\_\_\_\_
- Staff training on how to properly store and handle vaccines \_\_\_\_\_
- Staff training on motivational interviewing and how to address client vaccination questions \_\_\_\_\_
- Staff training on how to prepare and administer vaccines \_\_\_\_\_
- Staff training on how to screen clients for susceptibility and eligibility for different vaccines \_\_\_\_\_
- More time to administer vaccine during clinic visits \_\_\_\_\_
- Staff training on how to collect, enter, and transmit vaccinate administration data \_\_\_\_\_
- Staff training on how to report vaccination adverse events \_\_\_\_\_
- Staff training on how to submit to health insurance for reimbursement \_\_\_\_\_
- Other, specify \_\_\_\_\_

---

Which staffing need is the single most important?

- More staff who are licensed to administer vaccines
- More data entry staff
- Staff training on how to properly store and handle vaccines
- Staff training on motivational interviewing and how to address client vaccination questions
- Staff training on how to prepare and administer vaccines
- Staff training on how to screen clients for susceptibility and eligibility for different vaccines
- More time to administer vaccine during clinic visits
- Staff training on how to collect, enter, and transmit vaccinate administration data
- Staff training on how to report vaccination adverse events
- Staff training on how to submit to health insurance for reimbursement
- Other (as specified above)
- Decline

---

What would you need in order to provide vaccinations in your SSP? Select all that apply.

- Funding to purchase vaccines
- Access to a discount purchasing mechanism (e.g., partnership with hospital system or health department)
- Funding to purchase vaccine administration supplies (e.g., needles, syringes, alcohol prep pads, adhesive bandages)
- Staff who are licensed to administer vaccinations
- Staff who are trained to administer vaccinations
- Space (e.g., dedicated refrigerators) to store vaccines
- Trained staff to oversee storage and handling requirements of vaccines
- Data systems to support vaccine ordering, tracking, and reporting
- Data entry staff to support vaccine ordering, tracking, and reporting
- Supportive legal or policy environment to provide vaccination
- More time during client visits to provide vaccinations
- Client demand for vaccinations
- Other, specify

---

If other, specify

\_\_\_\_\_

---

Which of these is the single most important need in order to provide vaccinations in your SSP?

- Funding to purchase vaccines
- Access to a discount purchasing mechanism (e.g., partnership with hospital system or health department)
- Funding to purchase vaccine administration supplies (e.g., needles, syringes, alcohol prep pads, adhesive bandages)
- Staff who are licensed to administer vaccinations
- Staff who are trained to administer vaccinations
- Space (e.g., dedicated refrigerators) to store vaccines
- Trained staff to oversee storage and handling requirements of vaccines
- Data systems to support vaccine ordering, tracking, and reporting
- Data entry staff to support vaccine ordering, tracking, and reporting
- Supportive legal or policy environment to provide vaccination
- More time during client visits to provide vaccinations
- Client demand for vaccinations
- Other (as specified above)
- Decline

---

**Clients The final question asks about client barriers to vaccination.**

---

How common are the following reasons for clients who decline vaccination?

- Client does not have health insurance \_\_\_\_\_
- Client has health insurance, but the vaccine is only available for un- or underinsured \_\_\_\_\_
- Client is not susceptible (e.g., already vaccinated or already infected) \_\_\_\_\_
- Client does not have enough time to get vaccinated \_\_\_\_\_
- Client has competing needs of higher priority (e.g., food, clothing, shelter) \_\_\_\_\_
- Client expresses concern about vaccination (e.g., side effects, does not trust vaccine safety, does not trust vaccine manufacturers) \_\_\_\_\_
- Client does not feel they are at risk \_\_\_\_\_
- Other, specify \_\_\_\_\_
